# Supplementary material for: Enteral versus parenteral nutrition in critically ill patients: an updated systematic review and meta-analysis of randomized controlled trials
Source: Crit Care. 2016 Apr 29;20:117. doi: 10.1186/s13054-016-1298-1 (PMC4851818; doi:10.1186/s13054-016-1298-1)
Supplement: Additional file 1: Table A1. — Excluded studies of enteral versus parenteral nutrition. (PDF 109 kb) [file 13054_2016_1298_MOESM1_ESM.pdf]

# Enteral versus parenteral nutrition in critically ill patients: an updated systematic review and meta-analysis of randomized controlled trials

Gunnar Elke, Arthur R.H. van Zanten, Margot Lemieux, Michele McCall, Khursheed N. Jeejeebhoy, Matthias Kott, Xuran Jiang, Andrew G. Day, Daren K. Heyland

## Additional file 1

**Table A1. Excluded studies of enteral versus parenteral nutrition**

| Number | Author                  | Year | Reasons for exclusion                                               | Reference |
|--------|-------------------------|------|---------------------------------------------------------------------|-----------|
| 1      | Lim et al               | 1981 | Patients not considered to be adult critically ill patients         | [1]       |
| 2      | Sako et al.             | 1981 | Patients not considered to be adult critically ill patients         | [2]       |
| 3      | Bauer et al.            | 1984 | Patients not considered to be adult critically ill patients         | [3]       |
| 4      | Quayle et al.           | 1984 | Patients not considered to be adult critically ill patients         | [4]       |
| 5      | Seri et al.             | 1984 | Patients not considered to be adult critically ill patients         | [5]       |
| 6      | Wiedeck et al.          | 1984 | Patients not considered to be adult critically ill patients         | [6]       |
| 7      | Costalat et al.         | 1985 | Patients not considered to be adult critically ill patients         | [7]       |
| 8      | Bower et al.            | 1986 | Patients not considered to be adult critically ill patients         | [8]       |
| 9      | Fletcher et al.         | 1986 | Patients not considered to be adult critically ill patients         | [9]       |
| 10     | Hadley et al.           | 1986 | Pseudo-randomized study design                                      | [10]      |
| 11     | Young et al.            | 1987 | No relevant clinical outcomes meeting inclusion criteria reported   | [11]      |
| 12     | Greenberg et al.        | 1988 | Patients not considered to be adult critically ill patients         | [12]      |
| 13     | Hamaoui et al.          | 1990 | Patients not considered to be adult critically ill patients         | [13]      |
| 14     | Moore et al.            | 1992 | Systematic review, individual studies were reviewed for eligibility | [14]      |
| 15     | Von Meyenfeldt et al.   | 1992 | Patients not considered to be adult critically ill patients         | [15]      |
| 16     | Gonzalez-Huix et al.    | 1993 | Patients not considered to be adult critically ill patients         | [16]      |
| 17     | Iovinelli et al.        | 1993 | Patients not considered to be adult critically ill patients         | [17]      |
| 18     | Kudsk KA                | 1994 | Duplicate of Kudsk et al. 1992 [Reference 43 in manuscript]         | [18]      |
| 19     | Wicks et al.            | 1994 | Patients not considered to be adult critically ill patients         | [19]      |
| 20     | Baigrie et al.          | 1996 | Patients not considered to be adult critically ill patients         | [20]      |
| 21     | Hernandez-Aranda et al. | 1996 | Patients not considered to be adult critically ill patients         | [21]      |
| 22     | Suchner et al.          | 1996 | No relevant clinical outcomes meeting inclusion criteria reported   | [22]      |
| 23     | Georgiannos et al.      | 1997 | Patients not considered to be adult critically ill patients         | [23]      |
| 24     | Gioanotti et al.        | 1997 | Patients not considered to be adult critically ill patients         | [24]      |

|    |                        |      |                                                                     |      |
|----|------------------------|------|---------------------------------------------------------------------|------|
| 25 | McClave et al.         | 1997 | Patients not considered to be adult critically ill patients         | [25] |
| 26 | Reynolds et al.        | 1997 | Patients not considered to be adult critically ill patients         | [26] |
| 27 | Sand et al.            | 1997 | Patients not considered to be adult critically ill patients         | [27] |
| 28 | Shirabe et al.         | 1997 | Patients not considered to be adult critically ill patients         | [28] |
| 29 | Braga et al.           | 1998 | Patients not considered to be adult critically ill patients         | [29] |
| 30 | Windsor et al.         | 1998 | Patients not considered to be adult critically ill patients         | [30] |
| 31 | Oláh et al.            | 2000 | Patients not considered to be adult critically ill patients         | [31] |
| 32 | Bozetti et al.         | 2001 | Patients not considered to be adult critically ill patients         | [32] |
| 33 | Braga et al.           | 2001 | Patients not considered to be adult critically ill patients         | [33] |
| 34 | Braunschweig et al.    | 2001 | Systematic review, individual studies were reviewed for eligibility | [34] |
| 35 | Heyland et al.         | 2001 | Patients not considered to be adult critically ill patients         | [35] |
| 36 | Pacelli et al.         | 2001 | Patients not considered to be adult critically ill patients         | [36] |
| 37 | Abou-Assi et al.       | 2002 | Patients not considered to be adult critically ill patients         | [37] |
| 38 | Huang et al.           | 2000 | Non-randomized study design                                         | [38] |
| 39 | Oláh et al.            | 2002 | Pseudo-randomized study design                                      | [39] |
| 40 | Rayes et al.           | 2002 | Patients not considered to be adult critically ill patients         | [40] |
| 41 | Gupta et al.           | 2003 | Patients not considered to be adult critically ill patients         | [41] |
| 42 | Zhao et al.            | 2003 | No relevant clinical outcomes meeting inclusion criteria reported   | [42] |
| 43 | Louie et al.           | 2005 | Patients not considered to be adult critically ill patients         | [43] |
| 44 | Peter et al.           | 2005 | Systematic review, individual studies were reviewed for eligibility | [44] |
| 45 | Simpson et al.         | 2005 | Systematic review, individual studies were reviewed for eligibility | [45] |
| 46 | Eckerwall et al.       | 2006 | Patients not considered to be adult critically ill patients         | [46] |
| 47 | Petrov et al.          | 2006 | Patients not considered to be adult critically ill patients         | [47] |
| 48 | Radrizzani et al.      | 2006 | Control group received a non standard enteral formula               | [48] |
| 49 | Chen et al.            | 2007 | No relevant clinical outcomes meeting inclusion criteria reported   | [49] |
| 50 | Petrov et al.          | 2007 | Systematic review, individual studies were reviewed for eligibility | [50] |
| 51 | Tian et al.            | 2007 | Patients not considered to be adult critically ill patients         | [51] |
| 52 | Cao et al.             | 2008 | Systematic review, individual studies were reviewed for eligibility | [52] |
| 53 | Farimani and Bajestani | 2008 | Patients not considered to be adult critically ill patients         | [53] |
| 54 | Lam et al.             | 2008 | Pseudo-randomized study design                                      | [54] |

|    |                  |      |                                                                     |      |
|----|------------------|------|---------------------------------------------------------------------|------|
| 55 | Petrov et al.    | 2008 | Systematic review, individual studies were reviewed for eligibility | [55] |
| 56 | Cheng et al.     | 2009 | Patients not considered to be adult critically ill patients         | [56] |
| 57 | Doley et al.     | 2009 | Pseudo-randomized study design                                      | [57] |
| 58 | Nagata et al.    | 2009 | Patients not considered to be adult critically ill patients         | [58] |
| 59 | Petrov et al.    | 2009 | Systematic review, individual studies were reviewed for eligibility | [59] |
| 60 | Ryu et al.       | 2009 | Patients not considered to be adult critically ill patients         | [60] |
| 61 | Vieira et al.    | 2010 | Non-randomized study design                                         | [61] |
| 62 | Altintas et al.  | 2011 | Pseudo-randomized study design                                      | [62] |
| 63 | Cangelosi et al. | 2011 | Systematic review, individual studies were reviewed for eligibility | [63] |
| 64 | Klek et al.      | 2011 | Patients not considered to be adult critically ill patients         | [64] |
| 65 | Wang et al.      | 2013 | Systematic review, individual studies were reviewed for eligibility | [65] |

## References

1. Lim ST, Choa RG, Lam KH, et al. Total parenteral nutrition versus gastrostomy in the preoperative preparation of patients with carcinoma of the oesophagus. *Br J Surg* 1981; 68:69-72.
2. Sako K, Loré JM, Kaufman S, et al. Parenteral hyperalimentation in surgical patients with head and neck cancer: a randomized study. *J Surg Oncol* 1981; 16:391-402.
3. Bauer E, Graber R, Brodike R, et al. Ernährungsphysiologische, immunologische und klinische parameter bei prospektiv randomisierten patienten unter enteraler oder parenteraler ernährungstherapie nach dickdarmoperationen. *Infusionstherapie* 1984; 11:165-167.
4. Quayle AR, Mangnall DC, RG. A comparison of immediate post-operative enteral and parenteral nutrition in patients with gastric carcinoma. *Clin Nutr* 1984; 3:35-39.
5. Seri S, Aquilio E. Effects of early nutritional support in patients with abdominal trauma. *Ital J Surg Sci* 1984; 14:223-227.
6. Wiedeck H, Merkle N, Herfarth C, Grünert A. Postoperative enteral feeding following resection of the colon. *Anaesthesist* 1984; 33:63-67.
7. Costalat G, Vernhet J. Early postoperative enteral nutrition using a jejunal catheter in major digestive surgery. Comparison with total parenteral nutrition. *Chirurgie* 1985; 111:708-714.
8. Bower RH, Talamini MA, Sax HC, et al. Postoperative enteral vs parenteral nutrition. A randomized controlled trial. *Arch Surg* 1986; 121:1040-1045.
9. Fletcher JP, Little JM. A comparison of parenteral nutrition and early postoperative enteral feeding on the nitrogen balance after major surgery. *Surgery* 1986; 100:21-24.
10. Hadley MN, Grahm TW, Harrington T, et al. Nutritional support and neurotrauma: a critical review of early nutrition in forty-five acute head injury patients. *Neurosurgery* 1986; 19:367-373.
11. Young B, Ott L, Haack D et al. Effect of total parenteral nutrition upon intracranial pressure in severe head injury. *J Neurosurg* 1987; 67:76-80.
12. Greenberg GR, Fleming CR, Jeejeebhoy KN, et al. Controlled trial of bowel rest and nutritional support in the management of Crohn's disease. *Gut* 1988; 29:1309-1315.
13. Hamaoui E, Lefkowitz R, Olender L et al. Enteral nutrition in the early postoperative period: a new semi-elemental formula versus total parenteral nutrition. *J Parenter Enteral Nutr* 1990; 14:501- 507.
14. Moore FA, Feliciano DV, Andrassy RJ et al. Early enteral feeding, compared with parenteral, reduces postoperative septic complications. The results of a meta-analysis. *Ann Surg* 1992; 216:172-183.
15. Von Meyenfeldt MF, Meijerink WJ, Rouflart MM, et al. Perioperative nutritional support: a randomised clinical trial. *Clin Nutr* 1992; 11:180-186.
16. González-Huix F, Fernández-Bañares F, Esteve-Comas M et al. Enteral versus parenteral nutrition as adjunct therapy in acute ulcerative colitis. *Am J Gastroenterol* 1993; 88:227-232.

17. Iovinelli G, Marsili I, Varrassi G. Nutrition support after total laryngectomy. *J Parenter Enteral Nutr* 1993; 17:445-448.
18. Kudsk KA. Gut mucosal nutritional support--enteral nutrition as primary therapy after multiple system trauma. *Gut* 1994; 35:S52-4.
19. Wicks C, Somasundaram S, Bjarnason I, et al. Comparison of enteral feeding and total parenteral nutrition after liver transplantation. *Lancet* 1994; 344:837-840.
20. Baigrie RJ, Devitt PG, Watkin DS. Enteral versus parenteral nutrition after oesophagogastric surgery: a prospective randomized comparison. *Aust N Z J Surg* 1996; 66:668-670.
21. Hernández-Aranda JC, Gallo-Chico B, Ramírez-Barba EJ. Nutritional support in severe acute pancreatitis. Controlled clinical trial. *Nutr Hosp* 1996; 11:160-166.
22. Suchner U, Senftleben U, Eckart T, et al. Enteral versus parenteral nutrition: effects on gastrointestinal function and metabolism. *Nutrition* 1996; 12:13-22.
23. Georgiannos SN, Renaut AJ, Goode AW. Short-term restorative nutrition in malnourished patients: pro's and con's of intravenous and enteral alimentation using compositionally matched nutrients. *Int Surg* 1997; 82:301-306.
24. Gianotti L, Braga M, Vignali A, et al. Effect of route of delivery and formulation of postoperative nutritional support in patients undergoing major operations for malignant neoplasms. *Arch Surg* 1997; 132:1222-9; discussion 1229.
25. McClave SA, Greene LM, Snider HL, et al. Comparison of the safety of early enteral vs parenteral nutrition in mild acute pancreatitis. *J Parenter Enteral Nutr* 1997; 21:14-20.
26. Reynolds JV, Kanwar S, Welsh FK, et al. 1997 Harry M. Vars Research Award. Does the route of feeding modify gut barrier function and clinical outcome in patients after major upper gastrointestinal surgery. *J Parenter Enteral Nutr* 1997; 21:196-201.
27. Sand J, Luostarinen M, Matikainen M. Enteral or parenteral feeding after total gastrectomy: prospective randomised pilot study. *Eur J Surg* 1997; 163:761-766.
28. Shirabe K, Matsumata T, Shimada M, et al. A comparison of parenteral hyperalimentation and early enteral feeding regarding systemic immunity after major hepatic resection--the results of a randomized prospective study. *Hepatogastroenterology* 1997; 44:205-209.
29. Braga M, Gianotti L, Vignali A, et al. Artificial nutrition after major abdominal surgery: impact of route of administration and composition of the diet. *Crit Care Med* 1998; 26:24-30.
30. Windsor AC, Kanwar S, Li AG, et al. Compared with parenteral nutrition, enteral feeding attenuates the acute phase response and improves disease severity in acute pancreatitis. *Gut* 1998; 42:431-435.
31. Oláh A, Pardavi G, Belágyi T. [Early jejunal feeding in acute pancreatitis: prevention of septic complications and multiorgan failure]. *Magy Seb* 2000; 53:7-12.
32. Bozzetti F, Braga M, Gianotti L, et al. Postoperative enteral versus parenteral nutrition in malnourished patients with gastrointestinal cancer: a randomised multicentre trial. *Lancet* 2001; 358:1487-1492.
33. Braga M, Gianotti L, Gentilini O, et al. Early postoperative enteral nutrition improves gut oxygenation and reduces costs compared with total parenteral nutrition. *Crit Care Med* 2001; 29:242-248.
34. Braunschweig CL, Levy P, Sheean PM, Wang X. Enteral compared with parenteral nutrition: a meta-analysis. *Am J Clin Nutr* 2001; 74:534-542.
35. Heyland DK, Montalvo M, MacDonald S, et al. Total parenteral nutrition in the surgical patient: a meta-analysis. *Can J Surg* 2001; 44:102-111.
36. Pacelli F, Bossola M, Papa V, et al. Enteral vs parenteral nutrition after major abdominal surgery: an even match. *Arch Surg* 2001; 136:933-936.
37. Abou-Assi S, Craig K, O'Keefe SJ. Hypocaloric jejunal feeding is better than total parenteral nutrition in acute pancreatitis: results of a randomized comparative study. *Am J Gastroenterol* 2002; 97:2255-2262.
38. Huang YC, Yen CE, Cheng CH, Jih KS, Kan MN. Nutritional status of mechanically ventilated critically ill patients: comparison of different types of nutritional support. *Clin Nutr* 2000; 19:101-107.
39. Oláh A, Pardavi G, Belágyi T, et al. Early nasojejunal feeding in acute pancreatitis is associated with a lower complication rate. *Nutrition* 2002; 18:259-262.
40. Rayes N, Hansen S, Seehofer D, et al. Early enteral supply of fiber and Lactobacilli versus conventional nutrition: a controlled trial in patients with major abdominal surgery. *Nutrition* 2002; 18:609-615.
41. Gupta R, Patel K, Calder PC, et al. A randomised clinical trial to assess the effect of total enteral and total parenteral nutritional support on metabolic, inflammatory and oxidative markers in patients with predicted severe acute pancreatitis (APACHE II > or =6). *Pancreatology* 2003; 3:406-413.
42. Zhao G, Wang CY, Wang F, Xiong JX. Clinical study on nutrition support in patients with severe acute pancreatitis. *World J Gastroenterol* 2003; 9:2105-2108.

43. Louie BE, Noseworthy T, Hailey D, et al. 2004 MacLean-Mueller prize enteral or parenteral nutrition for severe pancreatitis: a randomized controlled trial and health technology assessment. *Can J Surg* 2005; 48:298-306.
44. Peter JV, Moran JL, Phillips-Hughes J. A metaanalysis of treatment outcomes of early enteral versus early parenteral nutrition in hospitalized patients. *Crit Care Med* 2005; 33:213-20; discussion 260.
45. Simpson F, Doig GS. Parenteral vs. enteral nutrition in the critically ill patient: a meta-analysis of trials using the intention to treat principle. *Intensive Care Med* 2005; 31:12-23.
46. Eckerwall GE, Axelsson JB, Andersson RG. Early nasogastric feeding in predicted severe acute pancreatitis: A clinical, randomized study. *Ann Surg* 2006; 244:959-65.
47. Petrov MS, Kukosh MV, Emelyanov NV. A randomized controlled trial of enteral versus parenteral feeding in patients with predicted severe acute pancreatitis shows a significant reduction in mortality and in infected pancreatic complications with total enteral nutrition. *Dig Surg* 2006; 23:336-44.
48. Radrizzani D, Bertolini G, Facchini R, et al. Early enteral immunonutrition vs. parenteral nutrition in critically ill patients without severe sepsis: a randomized clinical trial. *Intensive Care Med* 2006; 32:1191-1198.
49. Chen Z, Wang S, Yu B, Li A. A comparison study between early enteral nutrition and parenteral nutrition in severe burn patients. *Burns* 2007; 33:708-712.
50. Petrov MS, Zagainov VE. Influence of enteral versus parenteral nutrition on blood glucose control in acute pancreatitis: a systematic review. *Clin Nutr* 2007; 26:514-523.
51. Tian BL, Cao HF, Hu WM, et al. The morphological alterations of jejunal mucosa accepting early enteral nutrition for post-operative patients with severe acute pancreatitis. *Sichuan Da Xue Xue Bao Yi Xue Ban* 2007; 38:264-267.
52. Cao Y, Xu Y, Lu T, Gao F, Mo Z. Meta-analysis of enteral nutrition versus total parenteral nutrition in patients with severe acute pancreatitis. *Ann Nutr Metab* 2008; 53:268-275.
53. Farimani MRV, Bajestani NN. Comparison of early enteral feeding versus parenteral nutrition after resection of esophageal cancer. *J Crit Care* 2008; 23:448.
54. Lam NN, Tien NG, Khoa CM. Early enteral feeding for burned patients--an effective method which should be encouraged in developing countries. *Burns* 2008; 34:192-196.
55. Petrov MS, Pylypchuk RD, Emelyanov NV. Systematic review: nutritional support in acute pancreatitis. *Aliment Pharmacol Ther* 2008; 28:704-712.
56. Cheng XT, Li SL, Liu GL, Yang XM, Lu J. Effect of nutritional support on immune function in patients with severe pulmonary infection after renal transplantation. *Nan Fang Yi Ke Da Xue Xue Bao* 2009; 29:1159-1162.
57. Doley RP, Yadav TD, Wig JD, et al. Enteral nutrition in severe acute pancreatitis. *JOP* 2009; 10:157-162.
58. Nagata S, Fukuzawa K, Iwashita Y, et al. Comparison of enteral nutrition with combined enteral and parenteral nutrition in post-pancreaticoduodenectomy patients: a pilot study. *Nutr J* 2009; 8:24.
59. Petrov MS, Loveday BP, Pylypchuk RD, et al. Systematic review and meta-analysis of enteral nutrition formulations in acute pancreatitis. *Br J Surg* 2009; 96:1243-1252.
60. Ryu J, Nam BH, Jung YS. Clinical outcomes comparing parenteral and nasogastric tube nutrition after laryngeal and pharyngeal cancer surgery. *Dysphagia* 2009; 24:378-386.
61. Vieira JP, Araújo GF, Azevedo JR, et al. Parenteral nutrition versus enteral nutrition in severe acute pancreatitis. *Acta Cir Bras* 2010; 25:449-454.
62. Altintas ND, Aydin K, Türkoğlu MA, et al. Effect of enteral versus parenteral nutrition on outcome of medical patients requiring mechanical ventilation. *Nutr Clin Pract* 2011; 26:322-329.
63. Cangelosi MJ, Auerbach HR, Cohen JT. A clinical and economic evaluation of enteral nutrition. *Curr Med Res Opin* 2011; 27:413-422.
64. Klek S, Sierzega M, Turczynowski L, et al. Enteral and parenteral nutrition in the conservative treatment of pancreatic fistula: a randomized clinical trial. *Gastroenterology* 2011;141:157-63, 163.e1.
65. Wang X, Dong Y, Han X, et al. Nutritional support for patients sustaining traumatic brain injury: a systematic review and meta-analysis of prospective studies. *PLoS One* 2013; 8:e58838.
