# Supplementary material for: Enteral versus parenteral nutrition in critically ill patients: an updated systematic review and meta-analysis of randomized controlled trials
Source: Springer Nature journal article supplement (doi:10.1186/s13054-016-1298-1), 2016-04-29
Supplement: MOESM2 [file 10111794]

## Enteral versus parenteral nutrition in critically ill patients: an updated systematic review and meta-analysis of randomized controlled trials

Gunnar Elke, Arthur R.H. van Zanten, Margot Lemieux, Michele McCall, Khursheed N. Jeejeebhoy, Matthias Kott, Xuran Jiang, Andrew G. Day, Daren K. Heyland

### Additional file 2

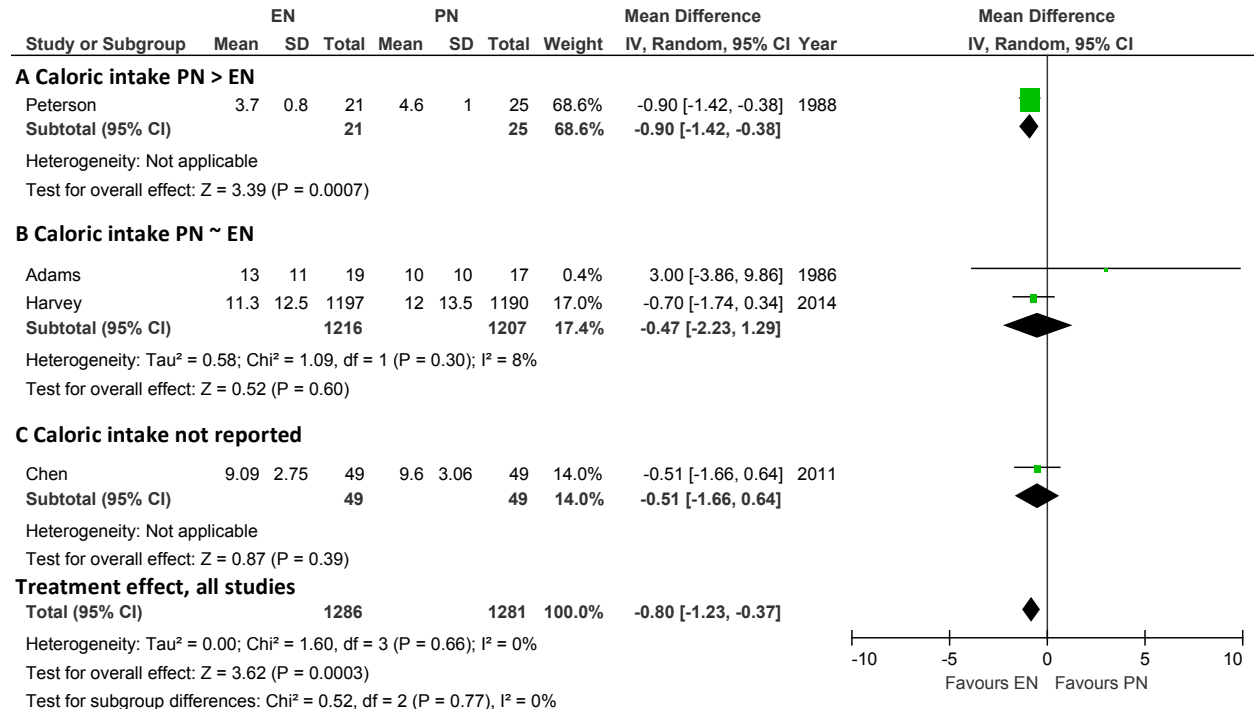

Figure A1. Subgroup analysis comparing the effect of enteral vs. parenteral nutrition according to the caloric intake on length of intensive care unit stay (N = 4 studies). Panel A shows the subgroup of aggregated trials in which the caloric intake in the PN group was significantly higher than in the EN group, Panel B shows the subgroup of aggregated trials in which the PN and EN groups received similar caloric intake and Panel C including one trial where caloric intake was not reported. *CI* confidence interval, *EN* enteral nutrition, *IV* inverse variance, *PN* parenteral nutrition, *SD* standard deviation

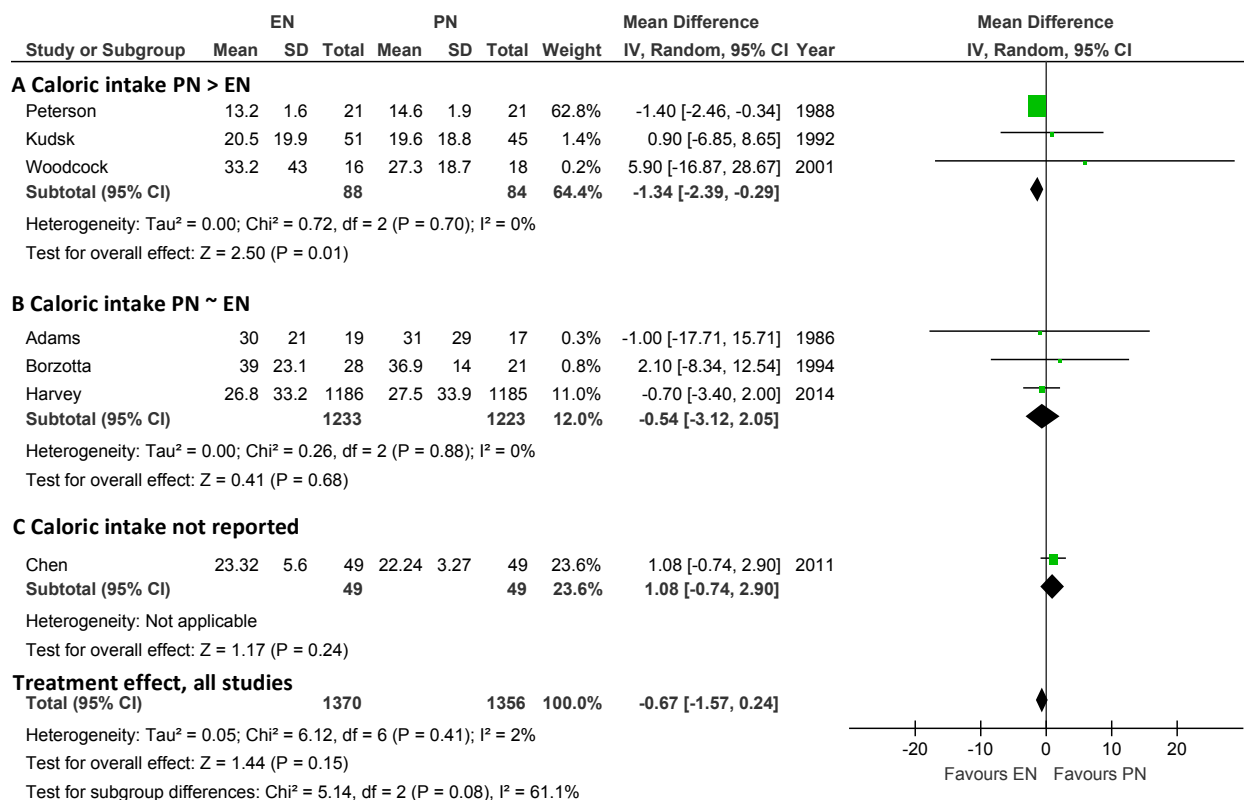

Figure A2. Subgroup analysis comparing the effect of enteral vs. parenteral nutrition according to the caloric intake on length of hospital stay (N = 7 studies). Panel A shows the subgroup of aggregated trials in which the caloric intake in the PN group was significantly higher than in the EN group, Panel B shows the subgroup of aggregated trials in which the PN and EN groups received similar caloric intake and Panel C including one trial where caloric intake was not reported. *CI* confidence interval, *EN* enteral nutrition, *IV* inverse variance, *PN* parenteral nutrition, *SD* standard deviation
