# Supplementary material for: Enteral versus parenteral nutrition in critically ill patients: an updated systematic review and meta-analysis of randomized controlled trials
Source: Springer Nature journal article supplement (doi:10.1186/s13054-016-1298-1), 2016-04-29
Supplement: MOESM4 [file 10111794]

# Enteral versus parenteral nutrition in critically ill patients: an updated systematic review and meta-analysis of randomized controlled trials

Gunnar Elke, Arthur R.H. van Zanten, Margot Lemieux, Michele McCall, Khursheed N. Jeejeebhoy, Matthias Kott, Xuran Jiang, Andrew G. Day, Daren K. Heyland

## Additional file 4

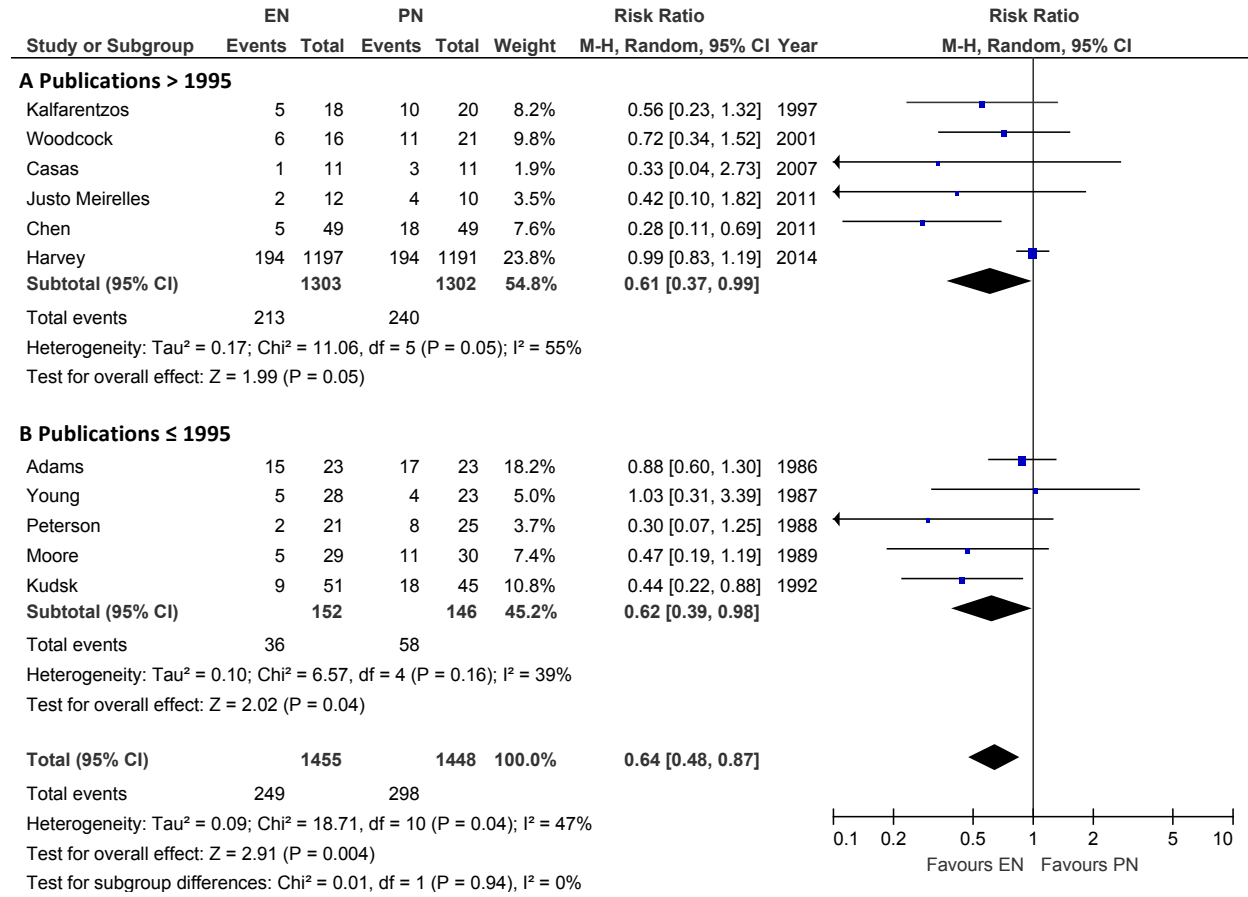

**Figure A4.** Subgroup analysis comparing the effect of enteral vs. parenteral nutrition on infectious complications in newer vs. older trials (with the publication date 1995 as cut-off).  
CI, confidence interval; EN, enteral nutrition; M-H, Mantel-Haenszel test; PN, parenteral nutrition.
